# Supplementary material for: Ultrasensitive detection of crystal violet using a molybdenum sulfide–silver nanostructure-based sensing platform: roles of the adsorbing semiconductor in SERS signal enhancement
Source: Royal Society of Chemistry journal article supplement (doi:10.1039/d3ay01374j), 2023-01-01
Supplement: d3ay01374j1.pdf [file d3ay01374j1.pdf]

Supporting Information for

**Ultrasensitive Detection of Crystal Violet Using a Molybdenum  
Sulfide-Silver Nanostructure-based Sensing Platform: Roles of the  
Adsorbing Semiconductor on SERS Signal Enhancement**

Minh Khanh Pham,<sup>a,1</sup> Dao Thi Nguyet Nga<sup>a,1</sup>, Quan Doan Mai<sup>a</sup>, Van Manh Tien<sup>a</sup>,

Nguyen Quang Hoa<sup>b</sup>, Vu Dinh Lam<sup>c</sup>, Ha Anh Nguyen<sup>a,\*</sup>, Anh-Tuan Le<sup>a,d,\*\*</sup>

<sup>a</sup>*Phenikaa University Nano Institute (PHENA), Phenikaa University, Hanoi 12116, Vietnam*

<sup>b</sup>*Faculty of Physics, VNU University of Science, Vietnam National University, Hanoi, 334  
Nguyen Trai, Thanh Xuan, Hanoi, Viet Nam*

<sup>c</sup>*Institute of Materials Science (IMS) and Graduate University of Science and Technology  
(GUST), Vietnam Academy of Science and Technology, 18 Hoang Quoc Viet, Hanoi 10000,  
Vietnam*

<sup>d</sup>*Faculty of Materials Science and Engineering (MSE), Phenikaa University, Hanoi 12116,  
Vietnam*

Corresponding authors:

\*[anh.nguyenha@phenikaa-uni.edu.vn](mailto:anh.nguyenha@phenikaa-uni.edu.vn) (H.A.Nguyen)

\*\*[tuan.leanh@phenikaa-uni.edu.vn](mailto:tuan.leanh@phenikaa-uni.edu.vn) (A.T.Le)

<sup>1</sup> M.K. Pham and D.T.N. Nga contributed equally to this work

### Calculation of limit of detection (LOD)

The standard curve of linear detecting range was given as:

$$Y = A + B \times \text{Log}(X) \quad (1)$$

where A and B are intercept and slope of regression equation obtained through the plot of the logarithmic SERS intensity (Y) – logarithmic concentration (X).

The LOD is calculated using the following equation <sup>1</sup>:

$$LOD = 10^{[(Y_{blank} + 3SD)/Y_{blank} - A]/B} \quad (2)$$

where  $Y_{blank}$  and SD are the SERS signal and the standard deviation of blank sample, respectively.

SD is calculated via the well-known formula:

$$SD = \sqrt{\frac{1}{n-1} \times \sum_i^n (x_i - x_{average})^2} \quad (3)$$

where  $x_i$  is the “i” sample of the series of measurements,  $x_{average}$  is the average value of SERS signal obtained from the blank sample repeated n times.

### Calculation of relative standard deviation (RSD)

The RSD value of repeatability and reproducibility is calculated via the well-known formula:

$$RSD = \frac{SD \times 100}{x_{average}} \quad (4)$$

where SD is the standard deviation that calculates using equation 4 and  $x_{average}$  is the average value of SERS signal obtained from each measurement.

### Calculation of enhancement factor (EF)

The EF value is calculated according to the well-established equation, which was employed in several published studies <sup>2,3</sup>:

$$EF = \frac{I_{SERS}}{I_{Raman}} \times \frac{N_{bulk}}{N_{surface}} \quad (5)$$

where  $I_{SERS}$  and  $I_{Raman}$  are Raman signal intensity of the analyte with and without SERS from the substrate, respectively; and  $N_{bulk}$  is the number of analyte molecules that are probed on the Raman spectrum, while  $N_{surface}$  is the number of analyte molecules probed using SERS.

$N_{bulk}$  can be calculated following:

$$N_{bulk} = \frac{A_{laser} \times h \times \rho}{M} \times N_A$$

(6)

where  $A_{laser}$ ,  $h$ ,  $\rho$  and  $m$  are the laser spot area, the focal length, the density of the solid analyte and its molecular weight, respectively; and  $N_A$  is the Avogadro number.

$N_{surface}$  can be expressed as:

$$N_{surface} = \frac{C \times V}{A_{substrate}} \times N_A \times A_{laser} \quad (7)$$

where  $C$ ,  $V$ ,  $A_{substrate}$  are the concentration, the volume drop-casted of the analyte, and the area of the substrate, respectively;  $N_A$  is the Avogadro number; and  $A_{laser}$  is the laser spot area.

Thus, EF can be calculated as:

$$EF = \frac{I_{SERS}}{I_{Raman}} \times \frac{N_{bulk}}{N_{surface}} = \frac{I_{SERS}}{I_{Raman}} \times \frac{h \times \rho \times A_{substrate}}{M \times C \times V}$$

(8)

In our case,  $I_{SERS}$  and  $I_{Raman}$  is Raman signal intensity with and without SERS substrate of Crystal Violet ( $736 \text{ cm}^{-1}$ ),  $h = 2 \text{ }\mu\text{m} = 2 \times 10^{-4} \text{ cm}$ ,  $\rho = 1.19 \text{ g/cm}^3$ ,  $M = 408 \text{ g/mol}$ ,  $A_{substrate} = 4\pi \text{ mm}^2$ ,  $C = 10^{-7} \text{ mol/L}$ ,  $V = 5 \text{ }\mu\text{L} = 5 \times 10^{-6} \text{ L}$ .

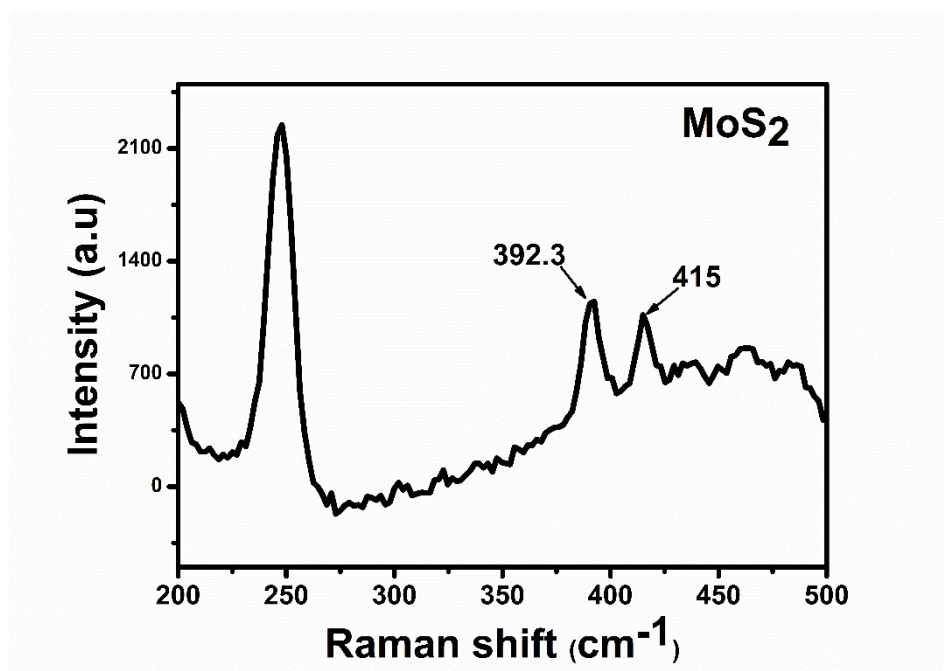

*Figure S1: Raman spectrum of MoS<sub>2</sub> nanosheets.*

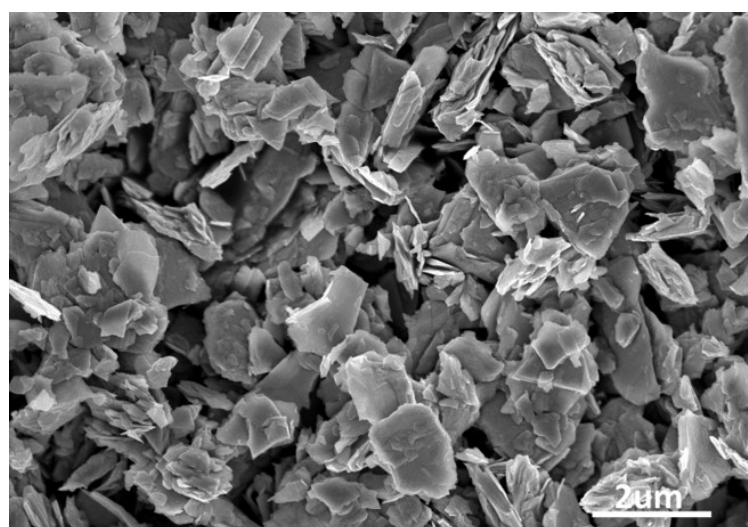

*Figure S2: SEM image of MoS<sub>2</sub>*

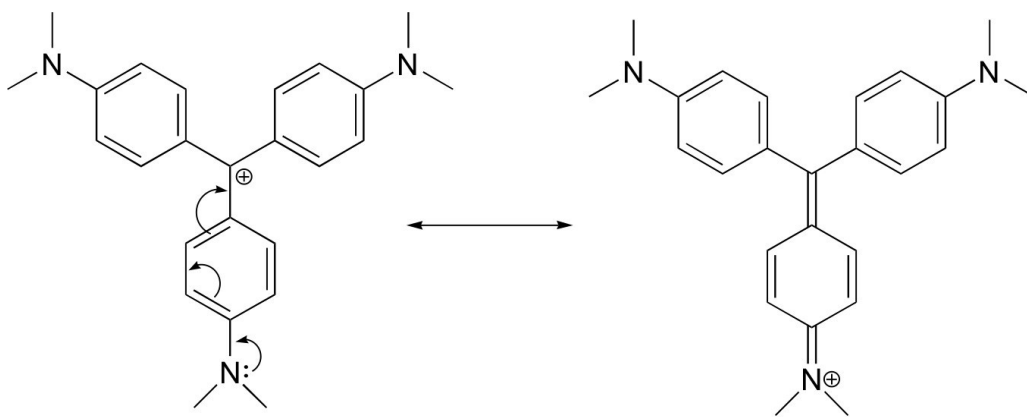

**Figure S3:** Molecular structure of CV and its delocalization of electrons.

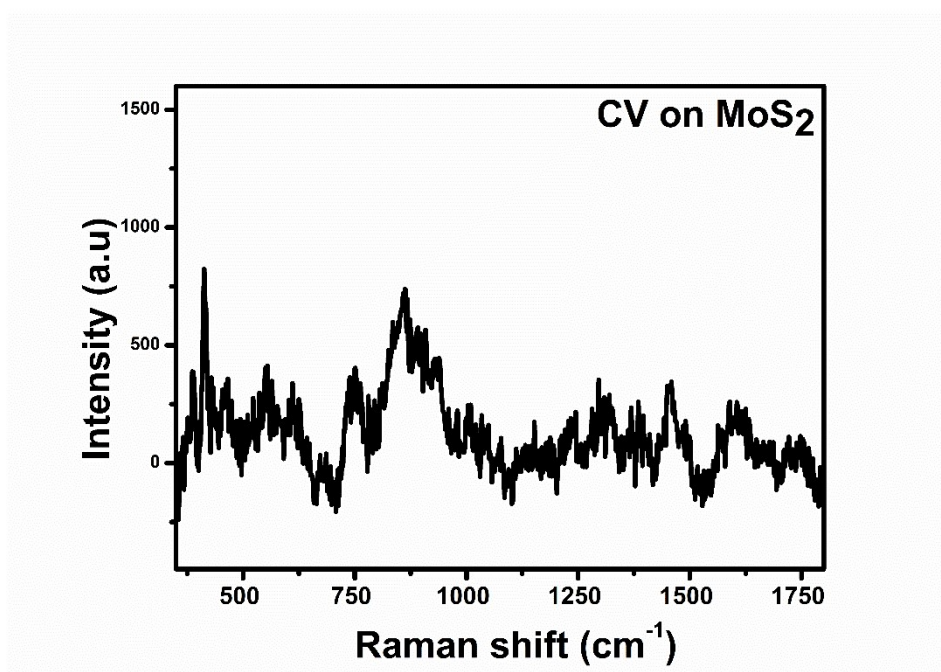

**Figure S4:** SERS spectrum for CV ( $10^{-5}$  M) on MoS<sub>2</sub>.

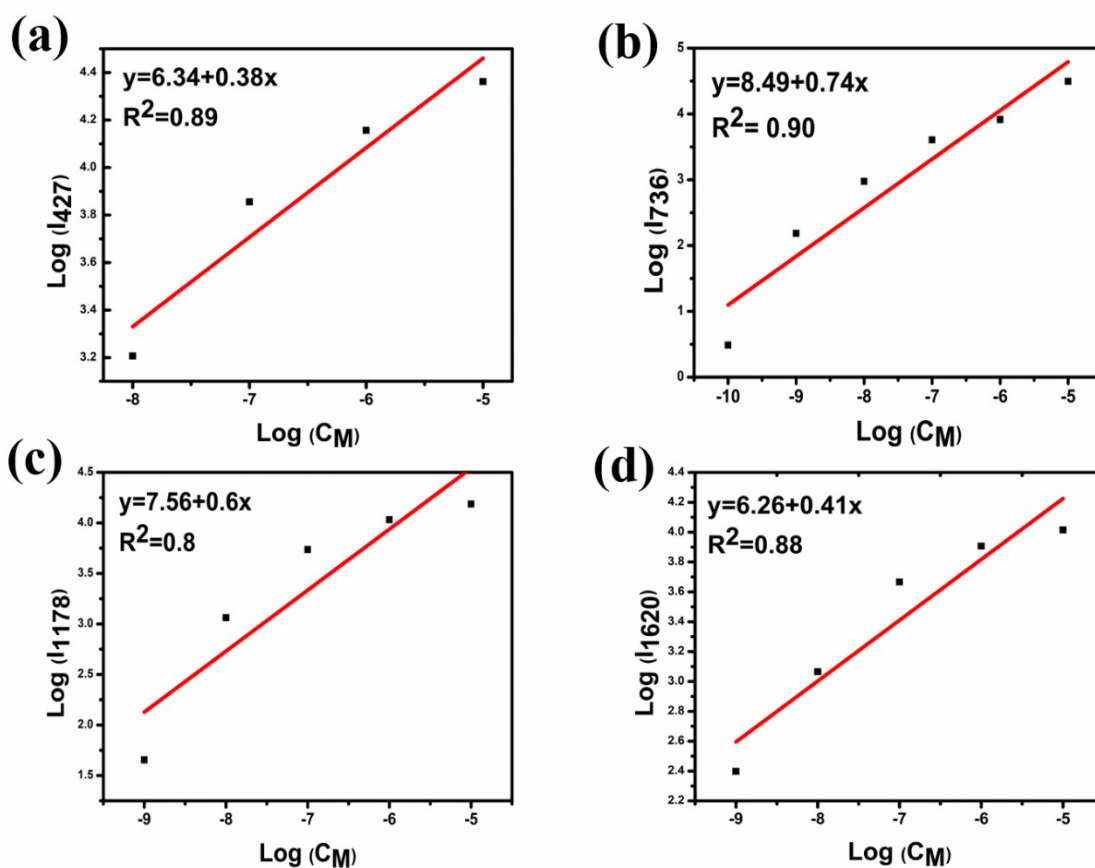

Figure S5: Plot of log of SERS intensity against CV concentration at (a)  $427\text{ cm}^{-1}$ ; (b)  $736$

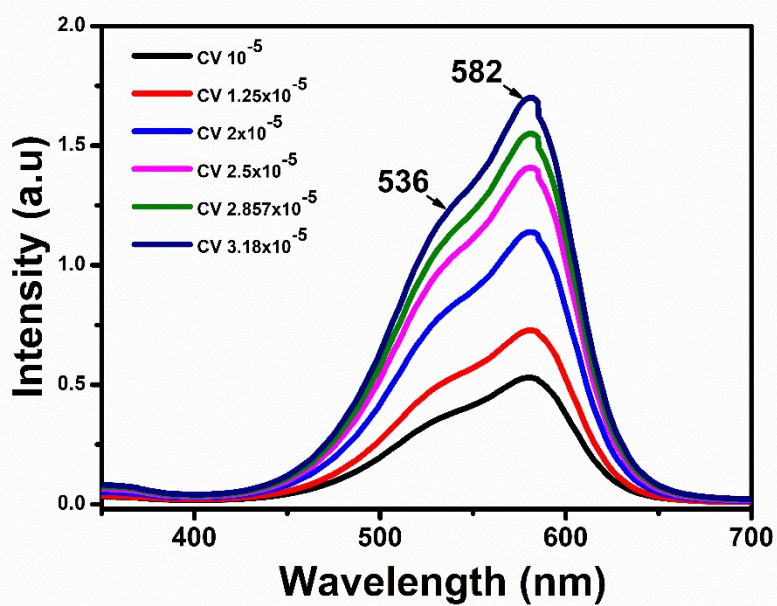

$\text{cm}^{-1}$ ; (c)  $1178\text{ cm}^{-1}$ ; and (d)  $1620\text{ cm}^{-1}$ .

*Figure S6: UV-vis absorption spectrum of CV at different concentrations.*

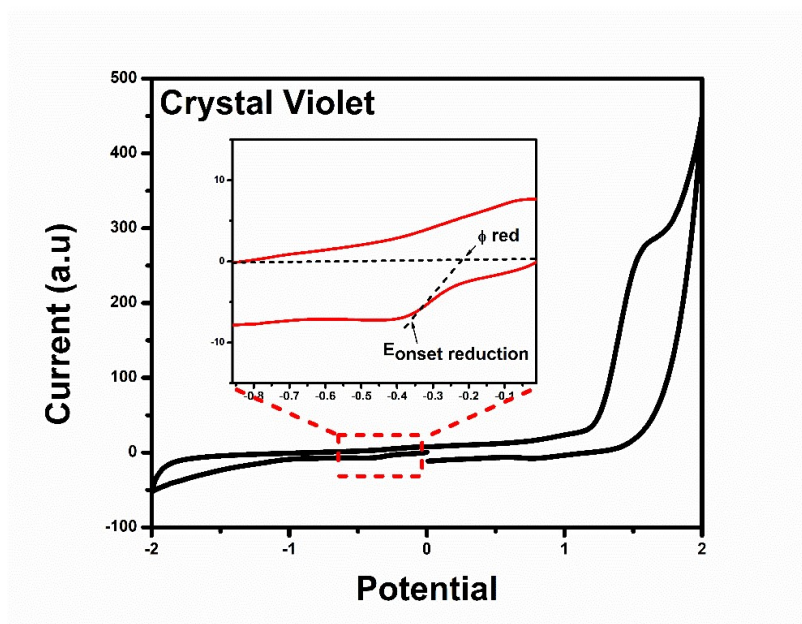

*Figure S7: Cyclic voltammogram of Crystal Violet and magnified curve to determine the onset reduction potential ( $\phi_{red}$ ).*

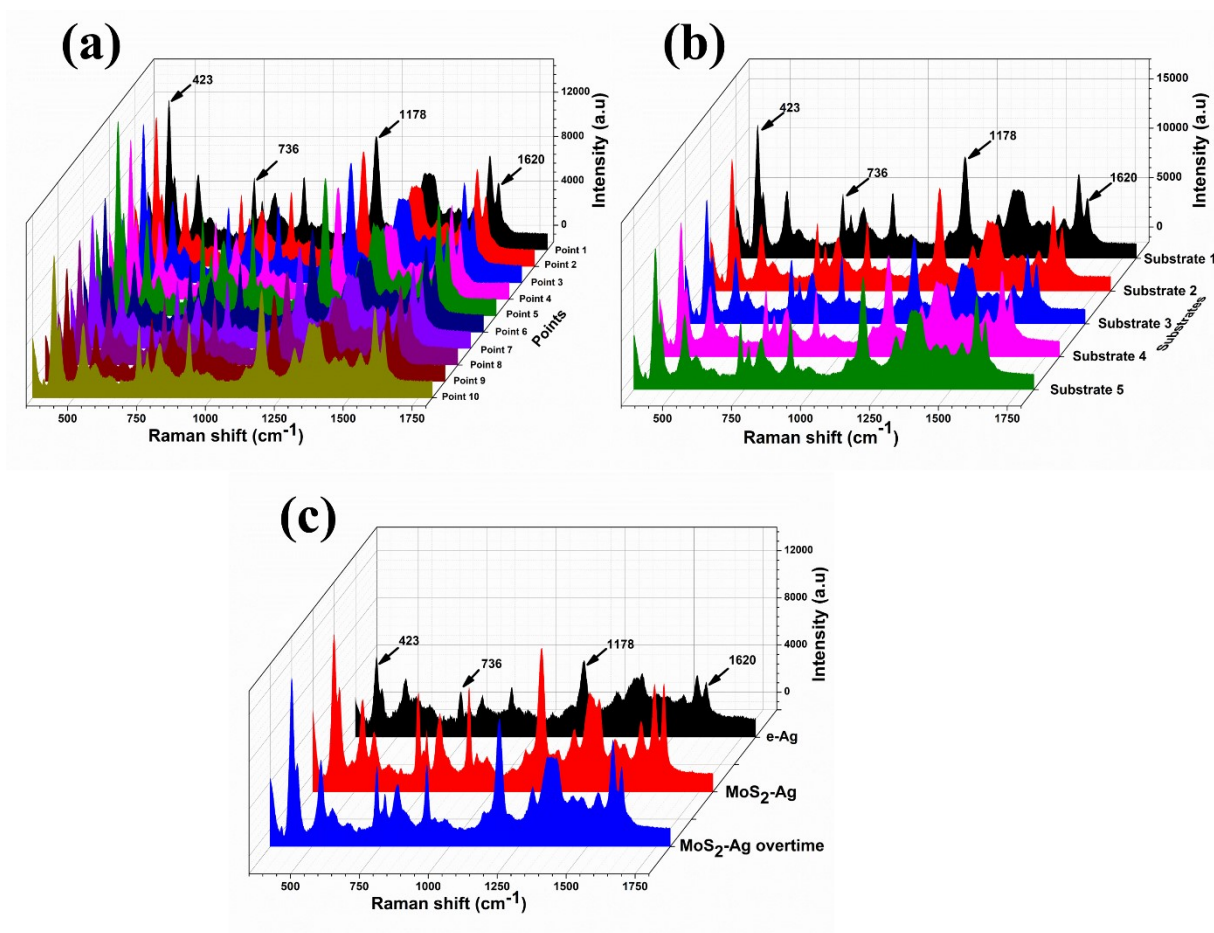

**Figure S8:** (a) Repeatability and (b) Reproducibility of SERS sensors for CV on MoS<sub>2</sub>/Ag overtime; (c) Raman spectrum of CV 10<sup>-6</sup>M comparing e-Ag, MoS<sub>2</sub>-Ag and MoS<sub>2</sub>-Ag overtime.

## References

- (1) Chen, R.; Shi, H.; Meng, X.; Su, Y.; Wang, H.; He, Y. Dual-Amplification Strategy-Based SERS Chip for Sensitive and Reproducible Detection of DNA Methyltransferase Activity in Human Serum. *Anal. Chem.* **2019**, *91* (5), 3597–3603. <https://doi.org/10.1021/acs.analchem.8b05595>.



- (2) Le Ru, E.C.; Blackie, E.; Meyer, M.; Etchegoin, P.G. Surface Enhanced Raman Scattering Enhancement Factors: A Comprehensive Study. *J. Phys. Chem. C*, 2007, **111**, 33, 13794-13803. <https://doi.org/10.1021/jp0687908>.
- (3) Fu, W. L.; Zhen, S. J.; Huang, C. Z; One-pot green synthesis of graphene oxide/gold nanocomposites as SERS substrates for malachite green detection. *Analyst*, 2013, **138**, 3075-3081. <https://doi.org/10.1039/C3AN00018D>.
